# Supplementary material
Source: Frontiers journal article supplement (https://www.frontiersin.org/articles/522041)
Supplement: Image_2.pdf [file Image_2.pdf]

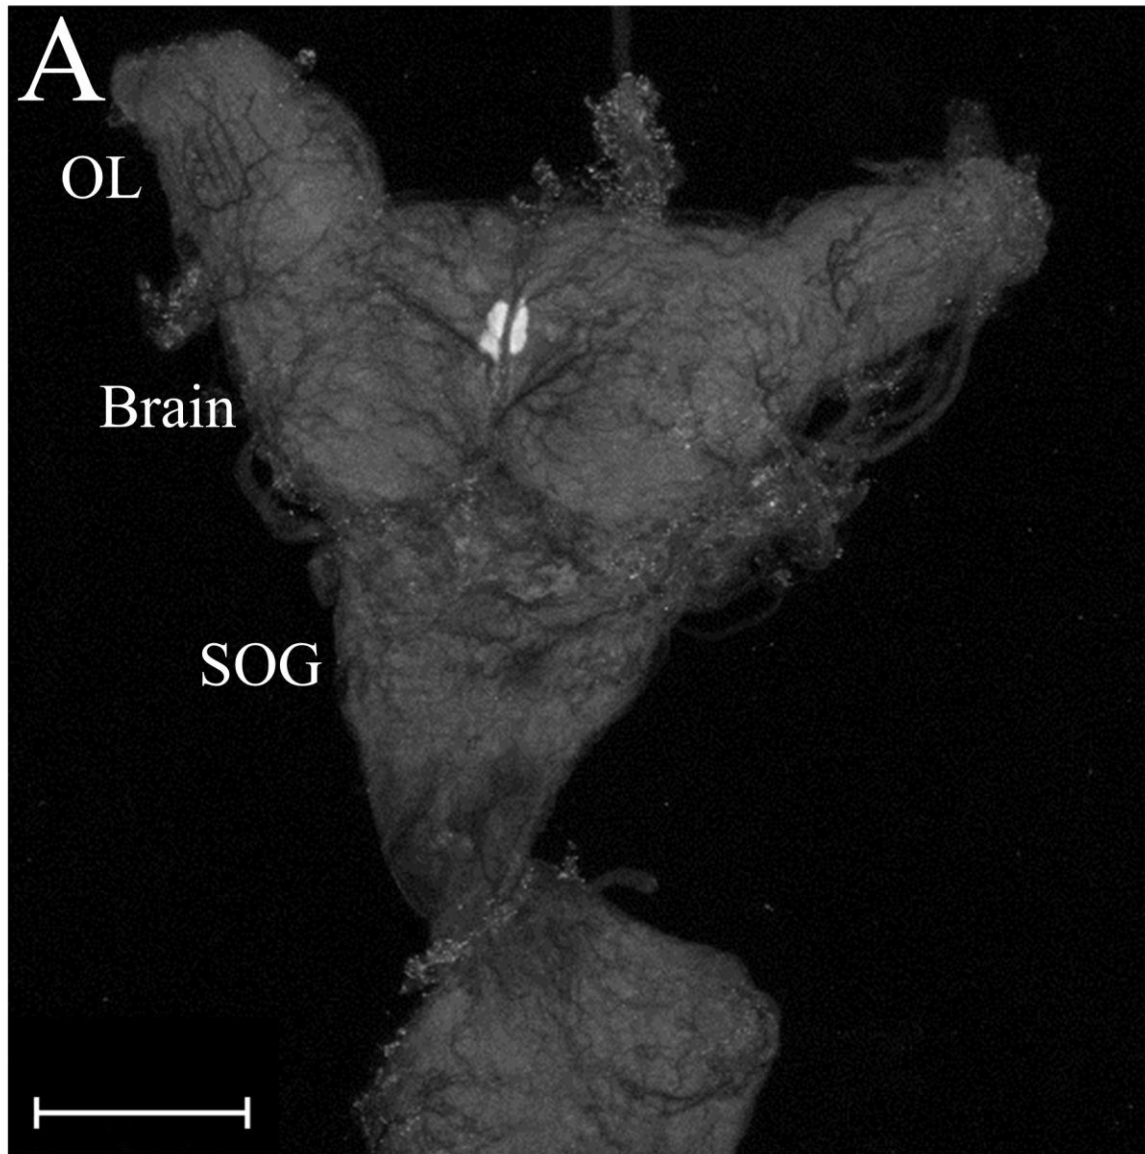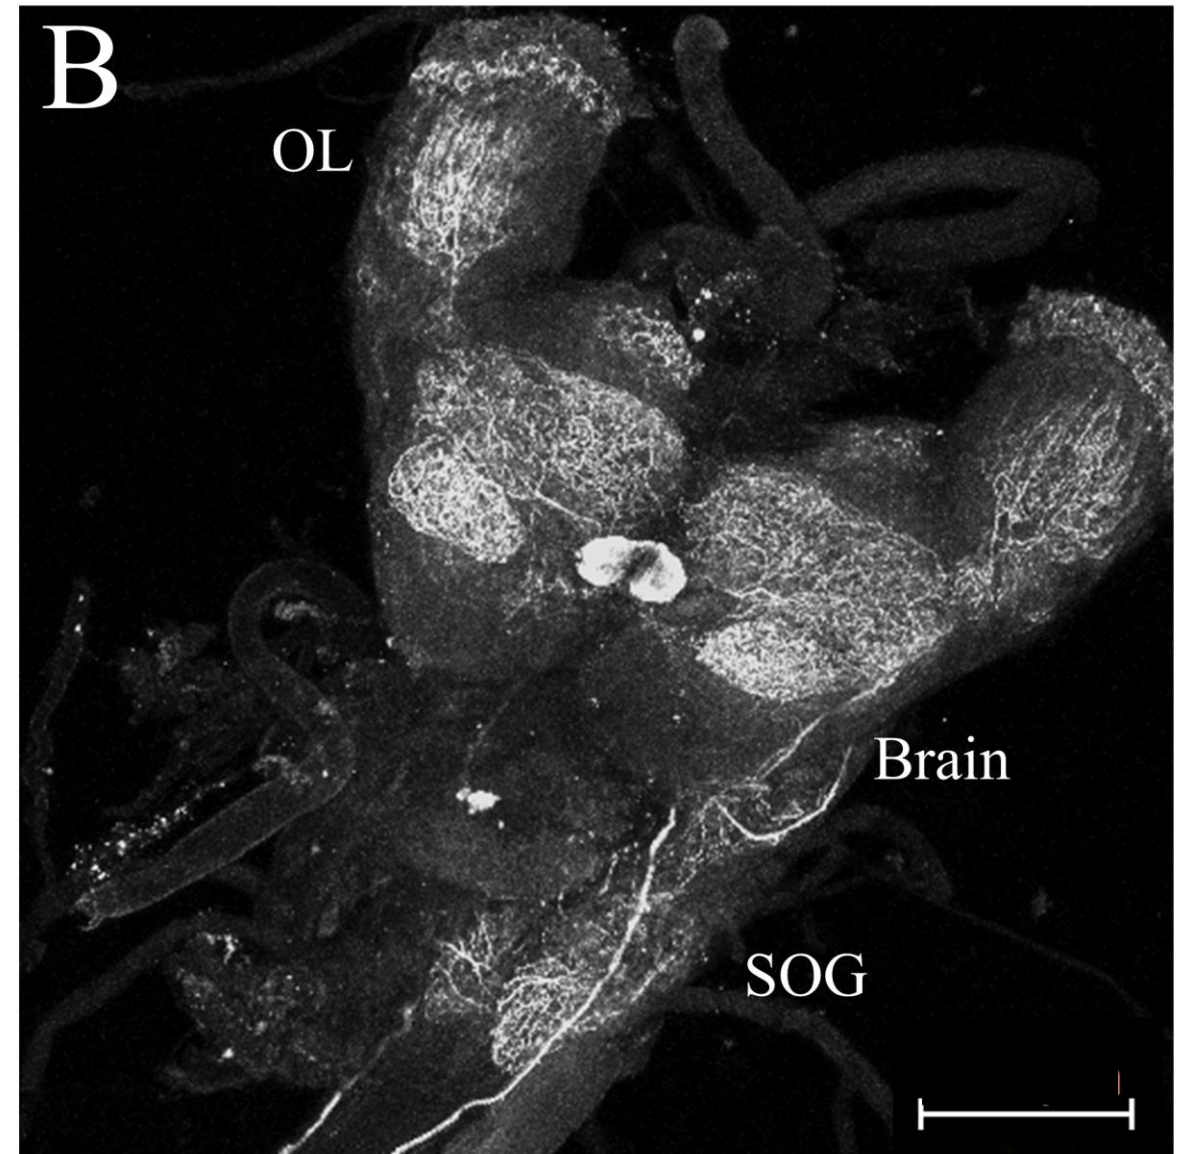

**Supplementary Figure 2:** Verification of antibody specificity for Rhopr-SIFa. Central nervous systems from 5th instar insects were incubated in antiserum that had been pre-absorbed with  $10^{-5}$  M Rhopr-SIFa or in antiserum without pre-absorption. (A) Preabsorbed antiserum resulted in reduced staining intensity in cell bodies and an absence of staining in neuropile processes. (B) Preparations (without pre-absorption with Rhopr-SIFa) display bright SIFa-like immunoreactive staining in cell bodies and neuropile processes. Brain; SOG, suboesophageal ganglion; PRO, prothoracic ganglion; OL, optic lobe. Scale bars: 100  $\mu$ m.
